# Supplementary material for: Utilizing the mechanisms of Nicotiana benthamiana asparagine synthetase NbAS-B for the creation of PGANPs: A novel approach to enhance growth and induce resistance against viral infection
Source: Research Square preprint supplement (doi:10.21203/rs.3.rs-5395869/v1), 2024-11-08
Supplement: Supplementary file 1 [file 0bab85f8106d937925a216dd.pdf]

---

**Utilizing the mechanisms of *Nicotiana benthamiana* asparagine synthetase NbAS-B for the creation of PGANPs: A novel approach to enhance growth and induce resistance against viral infection**

Gang Qiao <sup>a</sup>, Li Chen <sup>a</sup>, Shaorui Tian <sup>a</sup>, Juan Yang <sup>a</sup>, Siyi Xiao <sup>a</sup>, Xingyi Luo <sup>a</sup>, Lin Cai<sup>c</sup>,  
\*, Xiaozhou Ma <sup>a, b, \*</sup>, Xiaochao Sun <sup>a, b, \*</sup>

<sup>a</sup> *College of Plant Protection, Southwest University, Chongqing 400715, China*

<sup>b</sup> *Chongqing Key Laboratory of Soft-Matter Chemistry and Function Manufacturing, Southwest University, Chongqing 400715, China*

<sup>c</sup> *College of Tobacco Science of Guizhou University, Guizhou Key Laboratory for Tobacco Quality, Guiyang 550025, China*

Corresponding authors

Prof. Xianchao Sun

College of Plant Protection, Southwest University

Chongqing 400715, China

Email address: sunxianchao@163.com

A.P. Xiaozhou Ma

College of Plant Protection, Southwest University

Chongqing 400715, China

Email address: maxiaozhou@swu.edu.cn

A.P. Lin Cai

College of Tobacco Science, Guizhou University

Guiyang 550025, China

Email: lincai@gzu.edu.cn

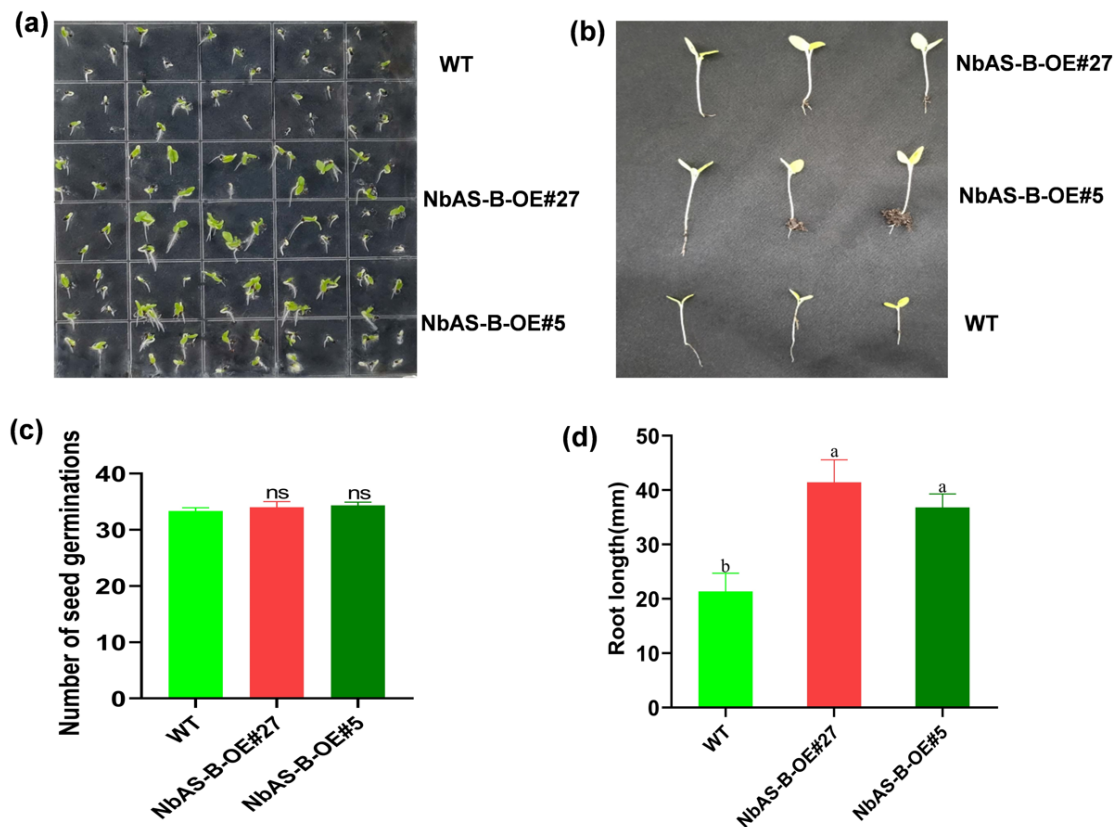

Figure S1 Figure of Seed Germination in NbAS-B Transgenic Plant Seeds (a) *NbAS-B* transgenic plant seed germination diagram, with 35 seeds each for *NbAS-B* transgenic plants and WT plants. (b) *NbAS-B* transgenic plant seedling growth chart. (c) Statistics of seed germination numbers for *NbAS-B* transgenic plants and WT. (d) root length of *NbAS-B* transgenic plants and WT plants.

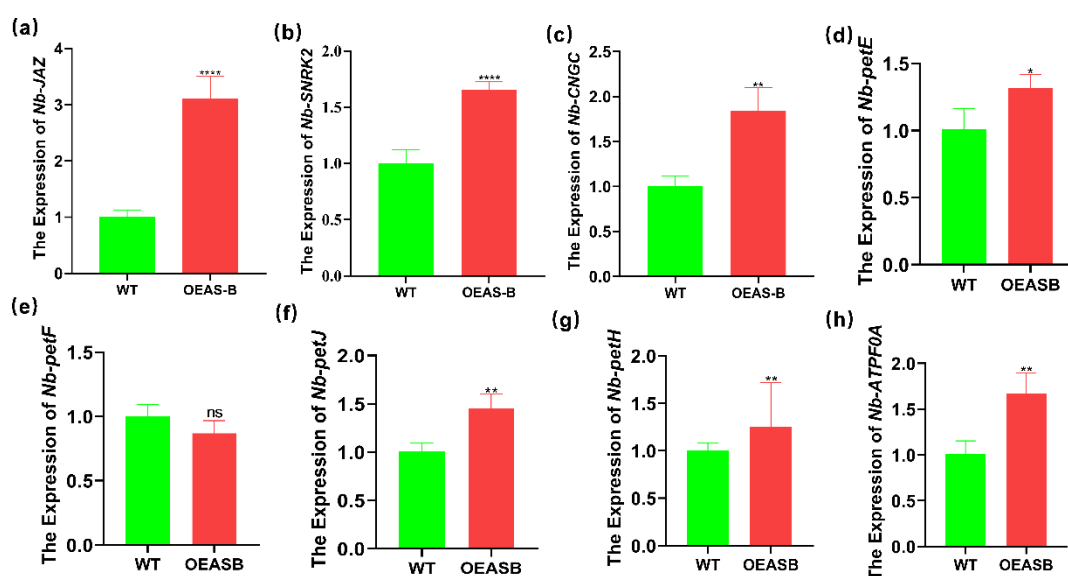

Fig. S2 (a) Validation of resistance genes *Nb-JAZ*, *Nb-SNRK2*, and *Nb-CNGC* in the

*NbAS-B* overexpression transcriptome. (d-h) Validation of genes related to the electron transport chain in the *NbAS-B* overexpression transcriptome.

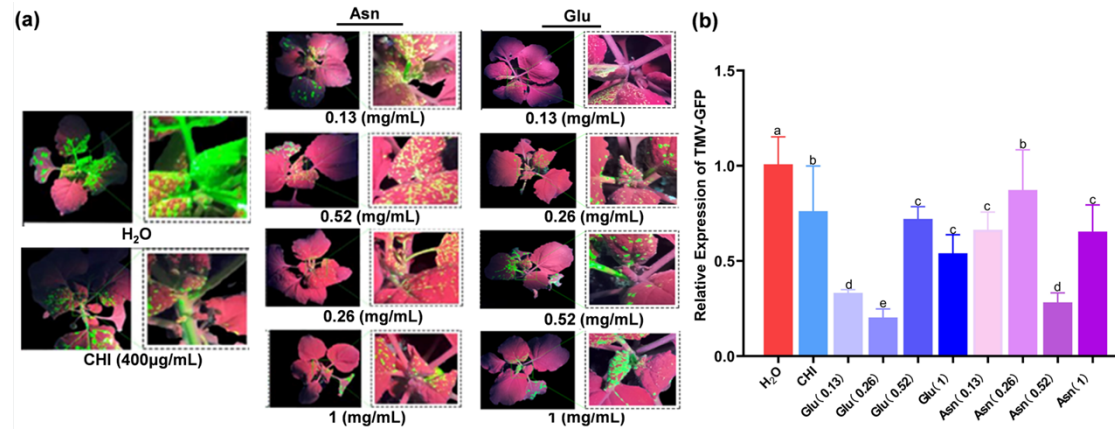

Fig. S3 The inductive effects of Glu and Asn on TMV-GFP. (a) Viral infection maps of leaves inoculated with TMV-GFP after being sprayed with different concentrations of Glu and Asn on the 7<sup>th</sup> day. (b) The effects of Glu and Asn on the transcriptional expression of TMV-GFP detected by qPCR.

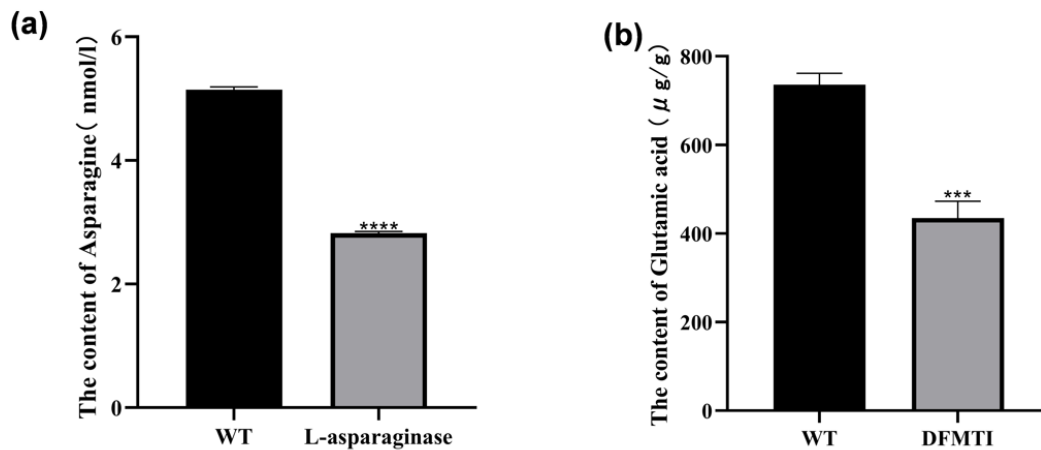

Fig. S4 (a-b) Detection of Asn and Glu content after treatment with inhibitors L-asparaginase and DFMTI.

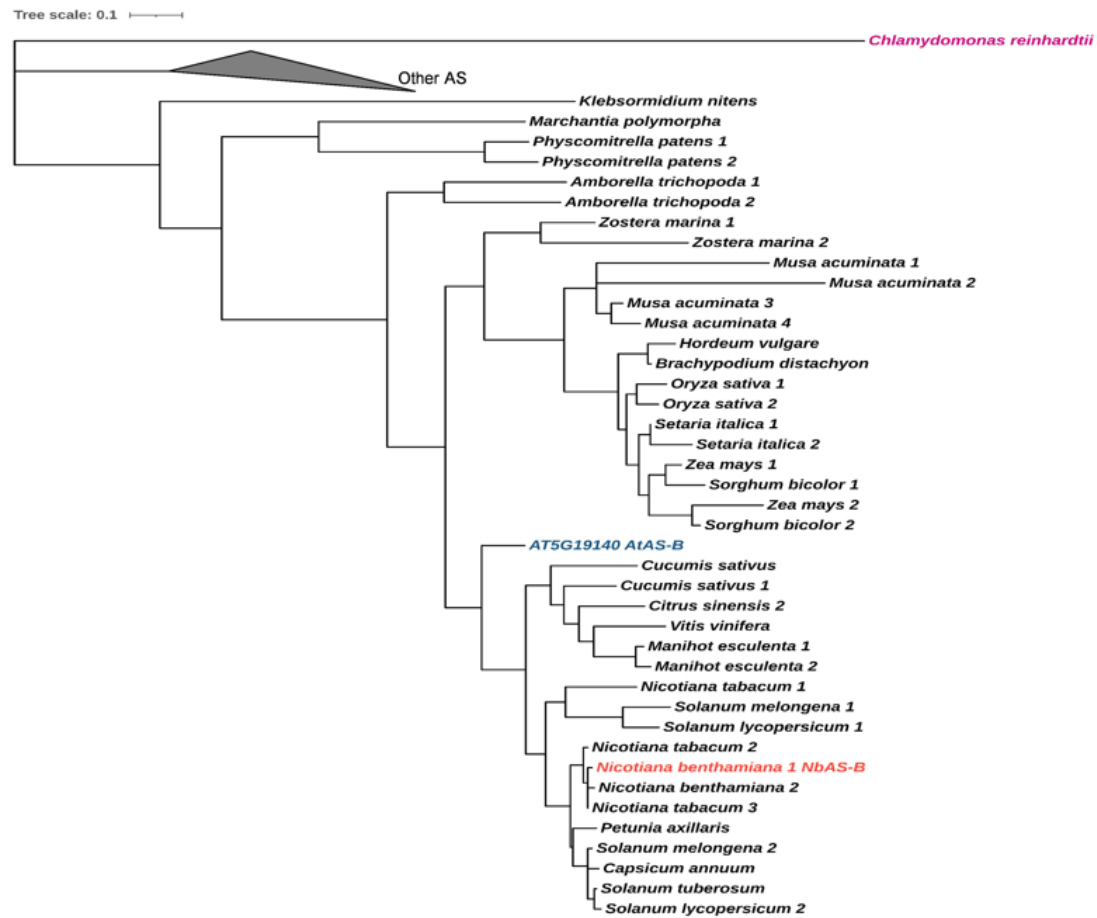

Fig. S5 Analysis of the evolutionary relationship of ASB in different species.

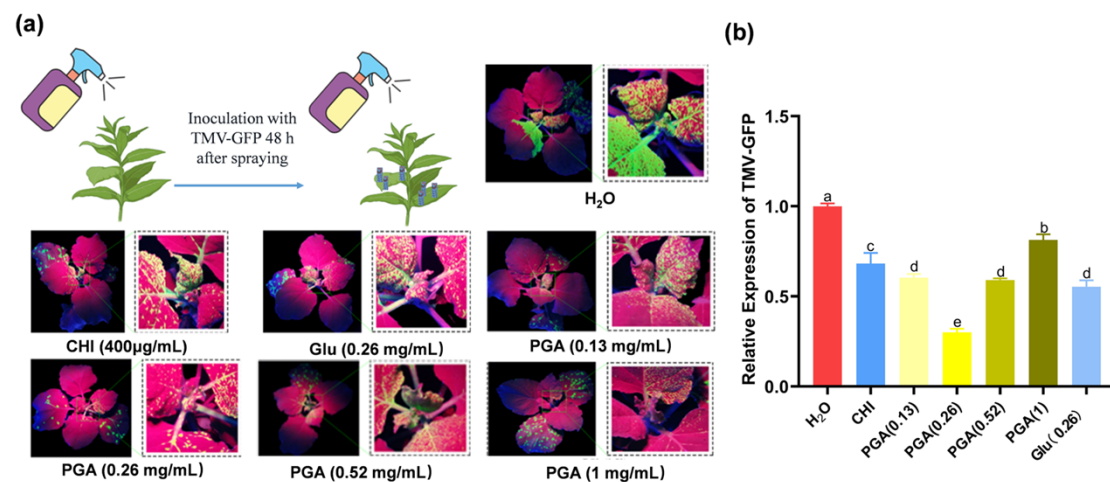

Fig. S6 (a) Foliar application of different concentrations of Glu and PGA followed by inoculation with TMV-GFP. (b) Virus expression levels in plants treated with PGA detected by qPCR.

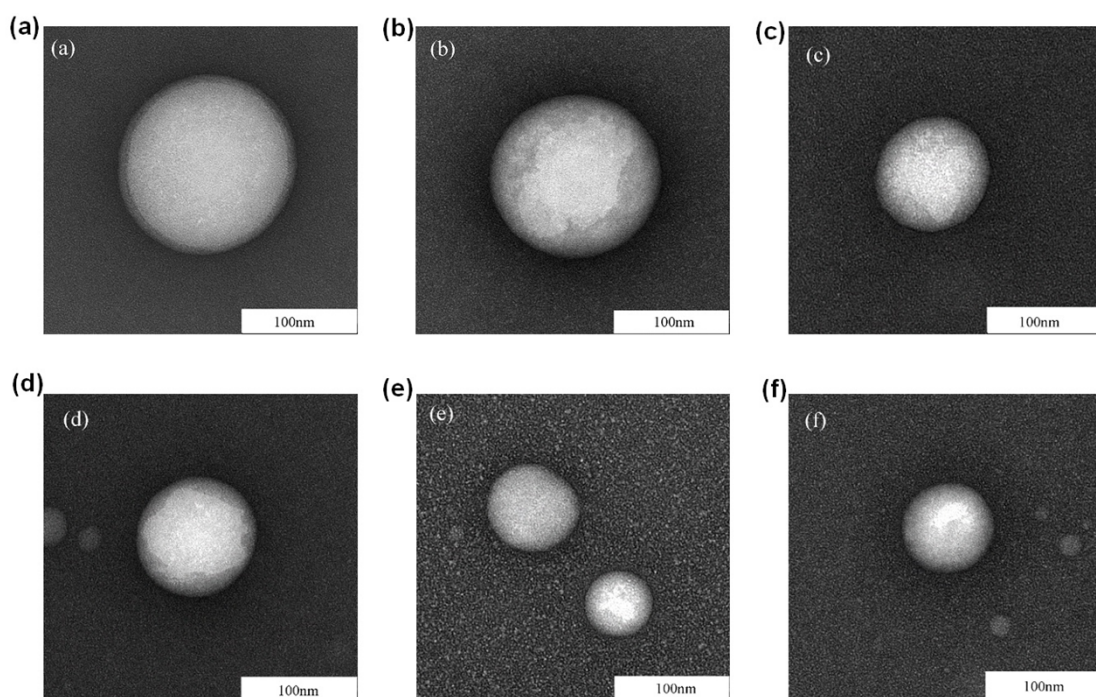

Fig. S7 (a-f) TEM images of PGANP. (a-f) represent different concentrations of PGANP.

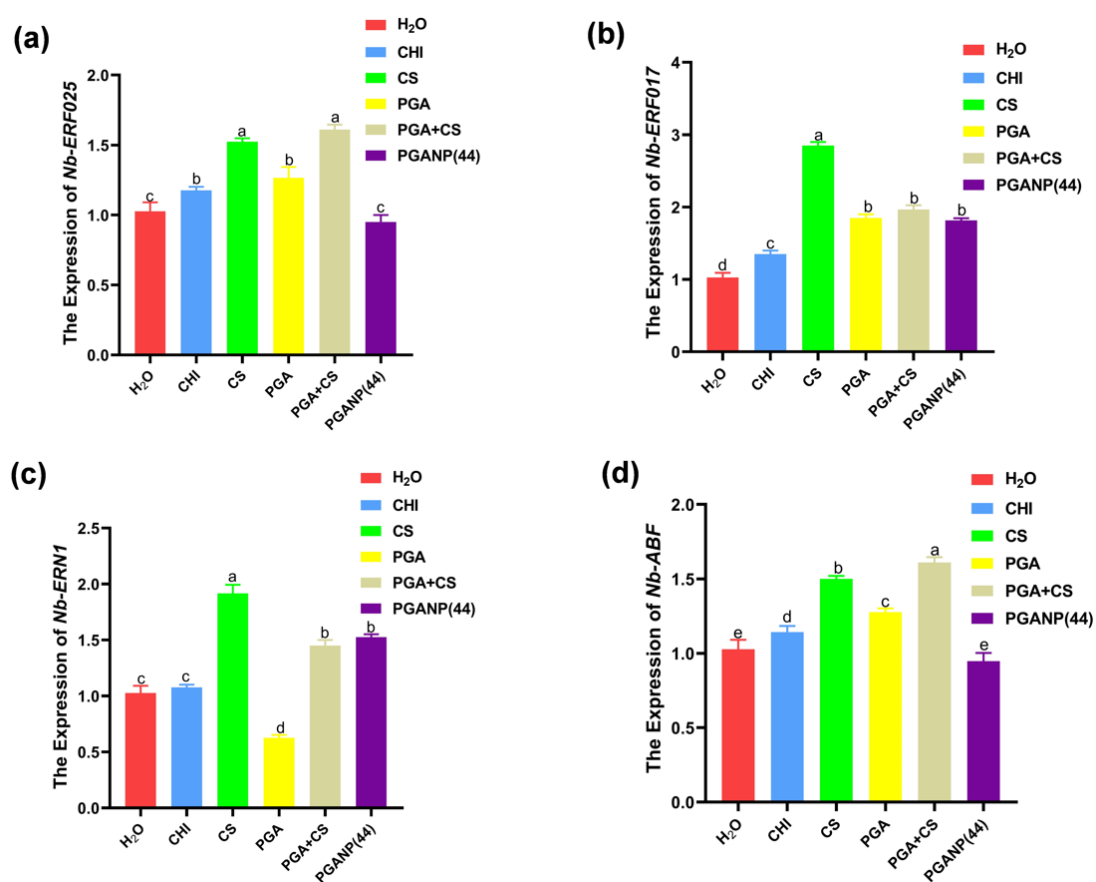

Fig. S8 Effect of PGANP on ABA and ET signaling pathways (a-b) Effects of PGANP

on the expression of ET hormone-related genes. (c-d) Effects of PGANP on the expression of ABA hormone-related genes

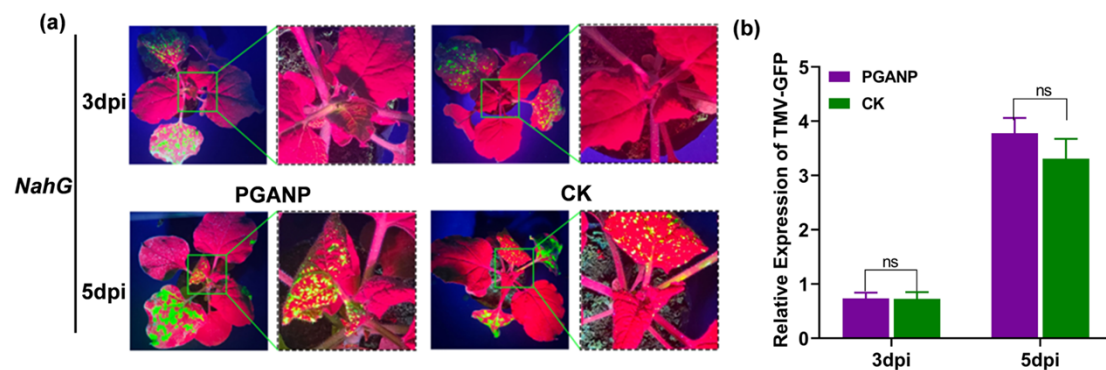

Fig. S9 (a) Symptom diagram of TMV-GFP inoculation after exogenous application of PGANP in *NahG* transgenic plants. (b) qPCR detection of the viral nucleic acid level on days 3 and 5 after inoculation with TMV-GFP following exogenous application of PGANP in *NahG*.

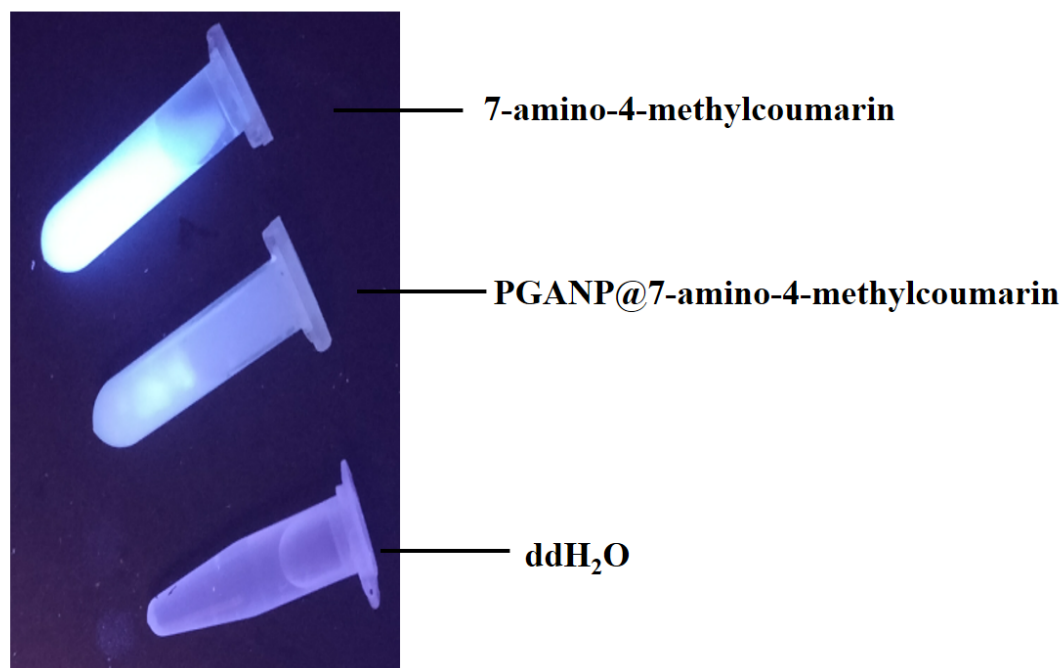

Fig. S10 Surface fluorescence of PGANP@7-amino-4-methylcoumarin material under the irradiation of a portable UV lamp.



Table S1 Primer sequence used in qPCR for amplifying target gene.

| Primers name | Forward Primers sequence | Reverse Primers sequence |
|--------------|--------------------------|--------------------------|
| qNbAS-B      | TTGCCAAGTCTGCAAATGAG     | CACCTTTGAGCAAATCAGCA     |
| qTMV CP      | TTAGGTTCCCTGACGGTGAC     | ACCGTTGCGTCGTCTACTCT     |
| qACTIN       | CTTGAAACAGCAAAGACCAGC    | CATCCTATCAGCAATGCCCG     |
| qPR1         | CGTGAAGATGTGGGTCAATG     | CCATACGGACGTTGTCCTCT     |
| qICS1        | GTGTCGGCTCTGCTGTCTTCT    | CTGCGTATAGCACGCCAATC     |
| qPAL2        | TTGCTTAAGGTTGTTGATCGTG   | GATCGAAGTCACTGCATTCTTC   |
| qERF025      | GCAAAGCAAAACTCAATTTCCC   | TTCGGTATACTTTGTGGTTCCA   |
| qERN1        | CCTTGTCACTAATGGAGCAGG    | CACGATGAAGCCAAGCG        |
| qERF017      | GCACACGACGTTGCTTTCTTC    | GTCGTCGTATCTCCGCATCC     |
| qABF         | ATTATCGGACACACAAACACTCG  | TTGTTCTCCAGTTCATGGGTGTA  |
| qpetH        | AGAGGCTTGTAGGCCCAAAT     | GACAGCTCGCCTGATACACA     |
| qpetE        | CAAAAGCAAGACTGCCATCA     | TGTAGCCAAAATGGTGTCCA     |
| qpetF        | TGGCAGTGTACAGGGTGAAA     | CCCTCGGATTGGTCTACTGA     |
| qpetJ        | GAGCTGACACGGAAGAGGAG     | TTTAGGCCAACCTTGATCG      |
| qATPF0A      | CCCCAATCCTTTTACCCATT     | AATCCAAGGAGCATGACAGG     |

Table S2 Elementary organic analysis of PGANP

| Sample       | Weight/mg | N%   | C%    | H%     |
|--------------|-----------|------|-------|--------|
| PGANP (6.28) | 1.915     | 2.06 | 31.18 | 5.109  |
| PGANP(14.14) | 2.144     | 1.77 | 66.01 | 10.553 |
| PGANP (22)   | 1.976     | 2.7  | 32.58 | 5.43   |
| PGANP (33)   | 2.124     | 3.58 | 34.04 | 5.702  |
| PGANP (44)   | 2.081     | 2.17 | 32.32 | 5.661  |
| PGANP (62.8) | 1.835     | 3.43 | 38.24 | 6.238  |
| CS           | 2.301     | 7.97 | 39.96 | 6.336  |
| PGA          | 2.216     | 8.1  | 33.01 | 4.611  |
